# Supplementary material for: Nystagmus in Laurence-Moon-Biedl Syndrome
Source: Case Rep Ophthalmol Med. 2015 Apr 23;2015:439409. doi: 10.1155/2015/439409 (PMC4423031; doi:10.1155/2015/439409)
Supplement: Supplementary file 1 — A 13-year-old male with LMB syndrome and probable pseudocycloid nystagmus. [file 439409.f1.zip]

Archive with 3 entries (3 files):
- Video 1.xesc
- Video 2.xesc
- Video 3.xesc
